# Supplementary material for: ADAM15 gene structure and differential alternative exon use in human tissues
Source: PubMed Central journal article supplement (PMC2148059; doi:10.1186/1471-2199-8-90), 2007-10-15
Supplement: 1471-2199-8-90-S1.pdf [file 1471-2199-8-90-S1.pdf]

| Branch seq<br>Splice acceptor seq.     | gene<br>exon seq.<br>exons translation                                                              | CDS location<br>exon #<br>CDS location         | Gene<br><intron length><br>Splice acceptor seq.<br>Intron phase |
|----------------------------------------|-----------------------------------------------------------------------------------------------------|------------------------------------------------|-----------------------------------------------------------------|
| FLJ32785<br>-471<br>.GCACCGTCCTTCCCG   | fusion intron 1<br>-470 -455<br>GTTAATAAAATGCCCT                                                    | fusion intron 2<br>-454                        | fusion intron 2<br>-454<br>gtacgcttcacg.                        |
| ADAM15                                 | 1 exon 1 79<br>ATGCGGCTGGCGCT.. GCTCCCAAATATAG<br>M R L A L L P N I G                               | 80 <1205><br>gtgagtcctccgcct.<br>phase 1       |                                                                 |
| .ccctcag... 1284<br>.tcctgggacctgcag   | 80 exon 2 186<br>GTGGCACTGAGGAG.. AAAAGGTGCTTCAG<br>G T E E K V L Q                                 | 1392 <637><br>gtgagctctcactcc.<br>phase 0      |                                                                 |
| .aggtgac... 2028<br>.ctctgggtgccacag   | 187 exon 3 263<br>ACCAGTCTGCCTGA.. CTGCTACAGAATAG<br>T S L P E L L Q N R                            | 2106 <416><br>gtaatagtgatggtg.<br>phase 2      |                                                                 |
| .ttagcac... 2521<br>.ttcttctactccacag  | 264 exon 4 342<br>GGAGTTGGTCCCAG.. AGGGACACACTTTG<br>E L V P G G H T L                              | 2601 <161><br>gtgagtcaggccctc.<br>phase 0      |                                                                 |
| .cactaat... 2761<br>.gttcccattgctgcag  | 343 exon 5 419<br>GAGAACTGCTGCTA.. TGCTCTGGGCTCAG<br>E N C C Y C S G L R                            | 2839 <87><br>gtatctgaggcgat.<br>phase 2        |                                                                 |
| .ctctgac... 2925<br>.tttcttttttcttag   | 420 exon 6 612<br>AGGCTTGGTGGTCC.. GCCACATTCGCCGG<br>G L V V L H I R R                              | 3119 <1283><br>gtgagatgaatggc.<br>phase 0      |                                                                 |
| .gcctgat... 4401<br>.tcttgtccatagtag   | 613 exon 7 675<br>AGGCGGGATGTGGT.. CTGATCACTCGGAG<br>R R D V V D H S E                              | 4465 <79><br>gtgagcctgtggcc.<br>phase 0        |                                                                 |
| .ctttcat... 4543<br>.tctcttggcctacag   | 676 exon 8 744<br>GCCCAGAAATACCG.. TCTTGCTGGACACA<br>A Q K Y R L L D T                              | 4613 <79><br>gtgagtgtggacag.<br>phase 0        |                                                                 |
| .ccctgac... 4691<br>.ccagctgtctttcag   | 745 exon 9 914<br>TTCTTCCGGCCCCT.. GCCCAGCTGGTGAC<br>F F R P L A Q L V T                            | 4862 <136><br>gtaaggccccagac.<br>phase 2       |                                                                 |
| .cctgaac... 4997<br>.ctctctgtcccacag   | 915 exon 10 999<br>TGGTACTTCATTCT.. GAGGTGTGAACATG<br>G T S F S G V N M                             | 5083 <482><br>gtgagttatttccag.<br>phase 0      |                                                                 |
| .gacctac... 5564<br>.cctcccaatgacag    | 1000 exon 11 1148<br>GACCACTCCACCAG.. GAGGCCTCCACAGA<br>D H S T S E A S T D                         | 5714 <86><br>gtaagtagctgcagg.<br>phase 2       |                                                                 |
| .ccccag... 5799<br>.tgccaccctccccag    | 1149 exon 12 1323<br>CTTCTACCAGGCC.. GTGGCTTCTGGAT<br>F L P G L G F L D                             | 5975 <274><br>gtgagccccctttccc.<br>phase 0     |                                                                 |
| .ctctgat... 6248<br>.tgctcctgcccacag   | 1324 exon 13 1416<br>GACTGCGTCGATCC.. GTCAAAATTGCCAG<br>D C V D P Q N C Q                           | 6342 <121><br>gtggtagagactag.<br>phase 0       |                                                                 |
| .cactgat... 6462<br>.atccaccctccacag   | 1417 exon 14 1721<br>CTGCGCCCCTCTGG.. TCCTGCACCCTAG<br>L R P S G S C T P R                          | 6768 <90><br>gtaagtgaggaaacc.<br>phase 2       |                                                                 |
| .tactaac... 6857<br>.tccccctccccacag   | 1722 exon 15 1917<br>AGATGCCATTTGTG.. GTGGCCTGGCCTG<br>D A I C G G P G L                            | 7054 <268><br>gtgagcagcctgggt.<br>phase 0      |                                                                 |
| .atctgat... 7321<br>.ctctccttgggtcag   | 1918 exon 16 1995<br>GTGTGTATAGACCA.. GCCATGGACATGGG<br>V C I D H H G H G                           | 7400 <1114><br>gtgagctgggatggg.<br>phase 0     |                                                                 |
| .tcctcat... 8513<br>.ccttgtacctcctag   | 1996 exon 17 2068<br>GTCTGTGACAGCAA.. CACTCAGCTCAAAG<br>V C D S N T Q L K A                         | 8587 <230><br>gtagcatgggggtgg.<br>phase 1      |                                                                 |
| .cccttaa... 8816<br>.gacttccgcccacag   | 2069 exon 18 2207<br>CAACCAGCTCCCTG.. ACCTGCCAGTACAG<br>T S S L T C Q Y R                           | 8956 <419><br>gtagagcatcacct.<br>phase 2       |                                                                 |
| .gtctgag... 9374<br>.tttctctatgcatag   | 2208 exon 19 2277<br>GGCAGCCCAATCTG.. CACGAGGCACTAAG<br>A A Q S G R G T K                           | 9445 <582><br>gtgagtcctggatgc.<br>phase 0      |                                                                 |
| .tgcctat... 10026<br>.ctctgcccctctcag  | 2278 exon 20a/b 2352<br>cagGCTAGTGCTCT.. CCAAGAGACTCCAG<br>Q A S A L K R L Q<br>R L V L S P R D S R | 10102 <86/414><br>gtaaatctggggccag.<br>phase 0 |                                                                 |
| .ctctcac... 10515<br>.cctctctctgttccag | 2353 exon 21a 2424<br>GCTGAGCTGGCTGA.. TGAGAAGCCCGAAG<br>A E L A D R S P K<br>L S W L T *           | 10588 <269><br>gtaacgggtgggggga.<br>phase 0    |                                                                 |
|                                        | 21b 2566<br>TTAATGGTGACAG<br>-                                                                      | 10730 <127><br>gtttgtttgcagaca.<br>phase -     |                                                                 |
| .ccccac... 10856<br>.ccttctctccctcag   | 2425 exon 22 2549<br>TCTCAGGGGCCAGC.. GTGGTACCCTCCAG<br>S Q G P A V V P S R<br>P L R G Q -          | 10982 <90><br>gtaggaggaccctg.<br>phase 2       |                                                                 |
| .ctctgac... 11071<br>.cttcccgaatccag   | 2550 exon 23 2865<br>ACCAGCGCCACCGC.. TTGCAATAAACGTGACATCTTGGGAGCGTT<br>P A P P P -                 |                                                |                                                                 |
